# Supplementary material for: Translating evidence into practice: eligibility criteria fail to eliminate clinically significant differences between real-world and study populations
Source: PubMed Central journal article supplement (PMC7214444; doi:10.1038/s41746-020-0277-8), 2020-05-11
Supplement: 41746_2020_277_MOESM2_ESM.pdf [file 41746_2020_277_MOESM2_ESM.pdf]

**SUPPLEMENTARY TABLE 1: Sitagliptin vs Glimepiride, Concept Definitions**

| Indication | concept                   | Included Concepts |                          | Excluded Concepts |              |
|------------|---------------------------|-------------------|--------------------------|-------------------|--------------|
|            |                           | concept code      | concept name             | concept code      | concept name |
|            | Type II Diabetes Mellitus | 201826            | Type 2 diabetes mellitus |                   |              |

| Eligibility Criteria                              | concept                                    | Included Concepts           |                                               | Excluded Concepts           |                                       |
|---------------------------------------------------|--------------------------------------------|-----------------------------|-----------------------------------------------|-----------------------------|---------------------------------------|
|                                                   |                                            | concept code                | concept name                                  | concept code                | concept name                          |
|                                                   | Type I Diabetes Mellitus                   | 201254                      | Type 1 diabetes mellitus                      |                             |                                       |
|                                                   | Liver Disease                              | 194984                      | Disease of Liver                              |                             |                                       |
|                                                   | Cardiovascular disease                     | 373503                      | Transient cerebral ischemia                   |                             |                                       |
|                                                   |                                            | 316139                      | Heart failure                                 |                             |                                       |
|                                                   |                                            | 374384                      | Cerebral ischemia                             |                             |                                       |
|                                                   |                                            | 375557                      | Cerebral embolism                             |                             |                                       |
|                                                   |                                            | 372924                      | Cerebral artery occlusion                     |                             |                                       |
|                                                   |                                            | 40479625                    | Atherosclerosis of artery                     |                             |                                       |
|                                                   |                                            | 4215140                     | Acute coronary syndrome                       |                             |                                       |
|                                                   | Hypertension                               | 3004249                     | BP systolic                                   |                             |                                       |
|                                                   |                                            | 3012888                     | BP diastolic                                  |                             |                                       |
|                                                   | Peripheral Vascular Disease (PVD)          | 321052                      | Peripheral vascular disease                   |                             |                                       |
|                                                   | Triglycerides                              | 3022192                     | Triglyceride [Mass/Volume] in Serum or Plasma |                             |                                       |
|                                                   | Human Immunodeficiency Virus (HIV)         | 439727                      | Human Immunodeficiency virus infection        |                             |                                       |
|                                                   | Malignancy/"Certain Cancers"               | 443392                      | Malignant neoplastic disease                  | 4300118                     | Squamous cell carcinoma               |
|                                                   |                                            |                             |                                               | 4179980                     | Malignant basal cell neoplasm of skin |
|                                                   | Hematologic Disorder                       | 443723                      | disorder of cellular component of blood       | 4280354                     | nutritional anemia                    |
|                                                   | Estimate Glomerular Filtration Rate (eGFR) | 3049187                     | eGFR with normals for non-black               |                             |                                       |
|                                                   |                                            | 3053283                     | eGFR with normals for black                   |                             |                                       |
|                                                   | Dipeptidyl peptidase 4 (DPP-4) inhibitors  | 21600783                    | Dipeptidyl peptidase 4 (DPP-4) inhibitors     |                             |                                       |
|                                                   | Insulin                                    | 21600713                    | Insulins and Analogues                        |                             |                                       |
|                                                   | GLP-1 memetic                              | 40219409                    | GLP-1 Receptor Agonist                        |                             |                                       |
| Peroxisome proliferator-activated receptor (PPAR) | 4354720                                    | PPAR gamma                  |                                               |                             |                                       |
| Kidney Disease                                    | 4030518                                    | Renal Impairment            |                                               |                             |                                       |
| Surgical Procedure                                | 4301351                                    | Surgical Procedure          |                                               |                             |                                       |
| Substance Abuse                                   | 36903635                                   | Substance-Related Disorders | 35809374                                      | Tobacco withdrawal syndrome |                                       |
|                                                   |                                            |                             | 36919133                                      | Tobacco abuse               |                                       |
|                                                   |                                            |                             | 4209423                                       | Nicotine dependence         |                                       |
|                                                   |                                            |                             | 36919130                                      | Nicotine dependence         |                                       |
|                                                   |                                            |                             | 434697                                        | Maternal tobacco abuse      |                                       |

Note that all concept definitions include descendants

**SUPPLEMENTARY TABLE 2: Sitagliptin vs Glimepiride, Cohort Creation**

|            |                                                                                                                                                                     |
|------------|---------------------------------------------------------------------------------------------------------------------------------------------------------------------|
| Indication | A condition occurrence of Type II Diabetes Mellitus<br>^<br>Age between 65 and 80<br>^<br>Continuous observation of at least 365 days before and 0 days after index |
|------------|---------------------------------------------------------------------------------------------------------------------------------------------------------------------|

|                         |                                                                  |                                                                     |
|-------------------------|------------------------------------------------------------------|---------------------------------------------------------------------|
| Eligibility<br>Criteria | No High Triglycerides                                            | Exactly 0 triglyceride measurements > 600mg/dL <sup>2</sup>         |
|                         | No Hypertension                                                  | Exactly 0 BP Systolic measurements > 140 mmHg <sup>2</sup>          |
|                         |                                                                  | ^                                                                   |
|                         |                                                                  | Exactly 0 BP Diastolic measurements > 90 mmHg <sup>2</sup>          |
|                         | No HIV                                                           | Exactly 0 diagnoses of HIV <sup>1</sup>                             |
|                         | No Type I Diabetes Mellitus                                      | ≤ 3 diagnoses of Type I Diabetes Mellitus <sup>2</sup>              |
|                         | No Surgical Procedures                                           | Exactly 0 Surgical Procedures <sup>3</sup>                          |
|                         | No cardiovascular disease                                        | Exactly 0 diagnoses of CVD <sup>2</sup>                             |
|                         | No Liver Disease                                                 | Exactly 0 diagnoses of Liver Disease <sup>2</sup>                   |
|                         | No PVD                                                           | Exactly 0 diagnoses of PVD <sup>2</sup>                             |
|                         | No Insulin or GLP-1 use                                          | Exactly 0 drug exposures to Insulin/GLP-1 <sup>4</sup>              |
|                         | No DPP-4 Use                                                     | Exactly 0 drug exposures to DPP-4 <sup>2</sup>                      |
|                         | No Malignancy/Certain Cancers                                    | Exactly 0 diagnoses of Malignancy or “Certain Cancers” <sup>1</sup> |
|                         | No Hematologic Disorders                                         | Exactly 0 diagnoses of Hematologic Disorders <sup>1</sup>           |
| No Renal Impairment     | Exactly 0 diagnoses of Renal Impairment <sup>1</sup>             |                                                                     |
| No eGFR ≥ 35 mL/min     | Exactly 0 eGFR measurements ≥ 35 mL/min <sup>1</sup>             |                                                                     |
| No Substance Abuse      | Exactly 0 diagnoses of a History of Substance Abuse <sup>1</sup> |                                                                     |

<sup>1</sup>between all days before and 1 days before index start date

<sup>2</sup>between 365 days before and 1 days before index start date

<sup>4</sup>between 56 days before and 1 day before index start state

<sup>3</sup>between 28 days before and 1 day before index start state

**SUPPLEMENTARY TABLE 3: Concept Definitions: PROVE-IT, Indication**

|            |                         | Included Concepts |                       | Excluded Concepts |              |                                                                                  |
|------------|-------------------------|-------------------|-----------------------|-------------------|--------------|----------------------------------------------------------------------------------|
| Indication | concept                 | concept code      | concept name          | concept code      | concept name |                                                                                  |
|            | Acute Coronary Syndrome | 35205182          | Angina unstable       | 4329847           | 4329847      | Old myocardial infarction                                                        |
|            |                         | 4329847           | Myocardial infarction | 44820861          | 44820861     | Acute myocardial infarction of unspecified site, subsequent episode of care      |
|            |                         |                   |                       | 44832376          | 44832376     | Acute myocardial infarction of other specified sites, subsequent episode of care |
|            |                         |                   |                       | 44834721          | 44834721     | Acute myocardial infarction of other lateral wall, subsequent episode of care    |
|            |                         |                   |                       | 44832374          | 44832374     | Acute myocardial infarction of other inferior wall, subsequent episode of care   |
|            |                         |                   |                       | 44819697          | 44819697     | Acute myocardial infarction of other anterior wall, subsequent episode of care   |
|            |                         |                   |                       | 44820860          | 44820860     | Acute myocardial infarction of inferoposterior wall, subsequent episode of care  |
|            |                         |                   |                       | 44820859          | 44820859     | Acute myocardial infarction of inferolateral wall, subsequent episode of care    |
|            |                         |                   |                       | 44820858          | 44820858     | Acute myocardial infarction of anterolateral wall, subsequent episode of care    |

Note that all concept definitions include descendants

**SUPPLEMENTARY TABLE 4: Concept Definitions: PROVE-IT, Eligibility Criteria**

|                      | Included Concepts                       |              |                                                                | Excluded Concepts |              |
|----------------------|-----------------------------------------|--------------|----------------------------------------------------------------|-------------------|--------------|
|                      | concept                                 | concept code | concept name                                                   | concept code      | concept name |
| Eligibility Criteria | Long Term Lipid-Lowering Therapy        | 21601853     | Lipid Modifying Agents                                         |                   |              |
|                      | Total Cholesterol                       | 3027114      | Cholesterol [Mass/volume] in Serum or Plasma                   |                   |              |
|                      | Statin                                  | 21601855     | HMG CoA reductase inhibitors                                   |                   |              |
|                      | Lipid Lowering Therapy with Fibric Acid | 21601864     | Fibrates                                                       |                   |              |
|                      | Lipid Lowering Therapy with Niacin      | 1517824      | Niacin                                                         |                   |              |
|                      | CYP420-34                               | 21601919     | Imidazole and triazole derivatives                             |                   |              |
|                      | Percutaneous Coronary Intervention      | 4216130      | Percutaneous coronary intervention                             |                   |              |
|                      | Coronary Artery Bypass Surgery          | 37522318     | Coronary artery bypass                                         |                   |              |
|                      | Obstructive Hepatobiliary Disease       | 35902850     | Obstructive bile duct disorders (excl neoplasms)               |                   |              |
|                      | Hepatic Disease                         | 194984       | Disease of liver                                               |                   |              |
|                      | Creatinine Kinease Level                | 3007220      | Creatine kinase [Enzymatic activity/volume] in Serum or Plasma |                   |              |
|                      | Creatinine Serum                        | 3016723      | Creatinine serum/plasma                                        |                   |              |

Note that all concept definitions include descendants

**SUPPLEMENTARY TABLE 5: PROVE-IT, Cohort Creation**

|            |                                                                                                                                                                             |
|------------|-----------------------------------------------------------------------------------------------------------------------------------------------------------------------------|
| Indication | A condition occurrence of Acute Coronary Syndrome<br>$\wedge$<br>Age $\geq$ 18 years<br>$\wedge$<br>Continuous observation of at least 0 days before and 0 days after index |
|------------|-----------------------------------------------------------------------------------------------------------------------------------------------------------------------------|

|                             |                                                          |                                                                                                                                                                                                                                                               |
|-----------------------------|----------------------------------------------------------|---------------------------------------------------------------------------------------------------------------------------------------------------------------------------------------------------------------------------------------------------------------|
| Eligibility<br>Criteria     | No long-term LLT Use                                     | Exactly 0 drug exposures to LLT <sup>2</sup> $\wedge$<br>Exactly 0 measurement of Total Cholesterol > 240mg <sup>3</sup><br>$\vee$<br>$\geq$ 1 drug exposures to LLT <sup>2</sup> $\wedge$<br>Exactly 0 measurement of Total Cholesterol > 200mg <sup>3</sup> |
|                             | No Statin Use over 80mg                                  | Exactly 0 drug exposures to Statins $\geq$ 80mg <sup>1</sup>                                                                                                                                                                                                  |
|                             | No LLT Use with Fibrin Acid Derivatives                  | Exactly 0 drug exposures to LLT with Fibrin Acid <sup>1</sup>                                                                                                                                                                                                 |
|                             | No LLT Use with Niacin                                   | Exactly 0 drug exposures to LLT with Niacin <sup>1</sup>                                                                                                                                                                                                      |
|                             | No CYP450 3A4 Use                                        | Exactly 0 drug exposures Inhibitors of CYP450 3A4 <sup>1</sup>                                                                                                                                                                                                |
|                             | No Percutaneous Coronary Intervention                    | Exactly 0 procedures of PIC <sup>3</sup>                                                                                                                                                                                                                      |
|                             | No Coronary Artery Bypass Surgery                        | Exactly 0 procedures of Coronary Artery Bypass Surgery <sup>4</sup>                                                                                                                                                                                           |
|                             | No Obstructive Hepatobiliary Disease                     | Exactly 0 diagnoses of Obstructive Hepatobiliary Disease <sup>2</sup>                                                                                                                                                                                         |
|                             | No Liver Disease                                         | Exactly 0 diagnoses of Liver Disease <sup>1</sup>                                                                                                                                                                                                             |
|                             | No Creatinine Kinase Levels > 3x Normal                  | Exactly 0 measurements of Creatinine Kinase > 354 U/L $\wedge$ Gender is Female <sup>1</sup><br>$\vee$<br>Exactly 0 measurements of Creatinine Kinase > 318 U/L $\wedge$ Gender is Male <sup>1</sup>                                                          |
| No Creatinine Levels > 20mg | Exactly 0 measurements of Creatinine > 20mg <sup>5</sup> |                                                                                                                                                                                                                                                               |

<sup>1</sup>between all days before and 1 days before index start date

<sup>2</sup>between 365 days before and 1 days before index start date

<sup>3</sup>between 180 days before and 1 days before index start date

<sup>4</sup>between 60 days before and 1 day before index start state

<sup>5</sup>between 30 days before and 1 day before index start state

**SUPPLEMENTARY TABLE 6: ACCOMPLISH, Concept Definitions, Indication**

|            |         | Included Concepts |              | Excluded Concepts     |              |
|------------|---------|-------------------|--------------|-----------------------|--------------|
| Indication | concept | concept code      | concept name | concept code          | concept name |
|            |         | Hypertension      | 316866       | Hypertensive disorder |              |

Note that all concept definitions include descendants

**SUPPLEMENTARY TABLE 7: ACCOMPLISH, Concept Definitions, Eligibility Criteria**

|                      |                                              | Included Concepts     |                                                            | Excluded Concepts |                               |
|----------------------|----------------------------------------------|-----------------------|------------------------------------------------------------|-------------------|-------------------------------|
| Eligibility Criteria | concept                                      | concept code          | concept name                                               | concept code      | concept name                  |
|                      |                                              | Antihypertensive Drug |                                                            |                   |                               |
|                      | ACE Inhibitors                               | 21601783              | Ace Inhibitors, Plain                                      |                   |                               |
|                      | Aldosterone                                  | 21601533              | Aldosterone antagonists                                    |                   |                               |
|                      | Acute Coronary Syndrome                      | 4215140               | Acute coronary syndrome                                    |                   |                               |
|                      | Angina Pectoris                              | 321318                | Angina pectoris                                            |                   |                               |
|                      | Antihypertensive Drugs                       | 21600381              | Antihypertensives                                          |                   |                               |
|                      | Antidiabetic Drugs                           | 21600744              | Blood Glucose Lowering Drugs, Excluding Insulins           |                   |                               |
|                      |                                              | 21600713              | Insulins and Analogs                                       |                   |                               |
|                      |                                              | 4336036               | Oral Hypoglycemic Agents, Oral                             |                   |                               |
|                      | Cardiovascular Disease (CVD)                 | 134057                | Disorder of cardiovascular system                          |                   |                               |
|                      | Coronary Revascularization                   | 37522318              | Coronary artery bypass                                     |                   |                               |
|                      |                                              | 4184298               | Percutaneous transluminal angioplasty                      |                   |                               |
|                      | Diabetes Mellitus                            | 35502089              | Glucose metabolism disorders (including diabetes mellitus) |                   |                               |
|                      | Heart Failure                                | 316139                | Heart failure                                              |                   |                               |
|                      | Insulin                                      | 21600713              | Insulins and Analogues                                     |                   |                               |
|                      | Ischemic Cerebrovascular Episodes            | 373503                | Transient cerebral ischemia                                |                   |                               |
|                      |                                              | 36718067              | Transient ischemic attack                                  |                   |                               |
|                      | Albumin                                      | 3024561               | Albumin serum/plasma                                       |                   |                               |
|                      | Myocardial Infarctions                       | 4329847               | Myocardial infarction                                      |                   |                               |
|                      |                                              | 35205189              | Myocardial infarction                                      |                   |                               |
|                      | Overnight Fasting Plasma Glucose             | 3037110               | Fasting glucose [Mass/volume] in Serum or Plasma           |                   |                               |
|                      | Peripheral Arterial Occlusive Disease (PROC) | 2002187               | Aorta-iliac-femoral bypass                                 |                   |                               |
|                      |                                              | 37522314              | Carotid endarterectomy                                     |                   |                               |
|                      |                                              | 37522318              | Coronary artery bypass                                     |                   |                               |
|                      |                                              | 37520683              | Leg amputation                                             |                   |                               |
|                      | Renal Disease                                | 37019308              | Renal disorder                                             |                   |                               |
|                      | Left Ventricular Hypertrophy                 | 35205348              | Ventricular hypertrophy                                    | 4231591           | Right ventricular hypertrophy |
|                      | Serum Creatinine                             | 3016723               | Creatinine serum/plasma                                    |                   |                               |
|                      | Systolic blood pressure                      | 3004249               | BP systolic                                                |                   |                               |
|                      |                                              | 3018586               | Systolic blood pressure-sitting                            |                   |                               |
|                      |                                              | 3035856               | Systolic blood pressure-standing                           |                   |                               |
|                      |                                              | 3009395               | Systolic blood pressure-supine                             |                   |                               |
|                      | Target Organ Damage                          | 4349444               | Hypertrophy, Left Ventricular                              |                   |                               |
|                      |                                              | 75650                 | Proteinuria                                                |                   |                               |
|                      |                                              | 37019318              | Renal failure                                              |                   |                               |
|                      |                                              | 376103                | Retinopathy                                                |                   |                               |
|                      |                                              | 443605                | Vascular dementia                                          |                   |                               |
|                      | Type 2 Diabetes Mellitus                     | 201826                | Type 2 diabetes mellitus                                   |                   |                               |
|                      | Unstable Angina                              | 35205182              | Angina unstable                                            |                   |                               |

Note that all concept definitions include descendants

**SUPPLEMENTARY TABLE 8: ACCOMPLISH, Cohort Creation**

|            |                                                                                                                                                                  |
|------------|------------------------------------------------------------------------------------------------------------------------------------------------------------------|
| Indication | A condition occurrence of Hypertension<br>$\wedge$<br>Age $\geq$ 55 years<br>$\wedge$<br>Continuous observation of at least 0 days before and 0 days after index |
|------------|------------------------------------------------------------------------------------------------------------------------------------------------------------------|

|                                      |                                                                                                         |                                                                                                                                                                                                                                                             |
|--------------------------------------|---------------------------------------------------------------------------------------------------------|-------------------------------------------------------------------------------------------------------------------------------------------------------------------------------------------------------------------------------------------------------------|
| Eligibility Criteria                 | High Systolic Blood Pressure or Treatment with Antihypertensives                                        | $\geq 1$ drug exposures to antihypertensive drug <sup>1</sup><br>$\vee$<br>$\geq 1$ measurements of Systolic Blood Pressure $\geq 160\text{mmHg}^1$                                                                                                         |
|                                      | If Age $\geq 60$ years, 1+ of the following; If $55 \leq \text{Age} \leq 60$ years, 2+ of the following |                                                                                                                                                                                                                                                             |
|                                      | Myocardial Infarction                                                                                   | a diagnosis of Myocardial Infarction <sup>1</sup>                                                                                                                                                                                                           |
|                                      | Unstable Angina                                                                                         | a diagnosis of Unstable Angina <sup>1</sup>                                                                                                                                                                                                                 |
|                                      | Coronary Revascularization                                                                              | A procedure of Coronary Revascularization <sup>1</sup>                                                                                                                                                                                                      |
|                                      | Stroke                                                                                                  | A diagnosis of Stroke <sup>1</sup>                                                                                                                                                                                                                          |
|                                      | Peripheral Arterial Occlusive Disease (PROC)                                                            | A diagnosis of PROC <sup>1</sup>                                                                                                                                                                                                                            |
|                                      | Diabetes Mellitus                                                                                       | A diagnosis of Diabetes Mellitus <sup>1</sup>                                                                                                                                                                                                               |
|                                      | Left Ventricular Hypertrophy                                                                            | A diagnosis of Left Ventricular Hypertrophy <sup>1</sup>                                                                                                                                                                                                    |
|                                      | Elevated Serum Creatinine                                                                               | A measurement of Creatinine $> 1.7^1 \wedge$ Gender is Male<br>$\vee$<br>A measurement of Creatinine $> 1.5^1 \wedge$ Gender is Female                                                                                                                      |
|                                      | ACE Inhibitor or Aldosterone Receptor Blocker (ARB) Use with Elevated Albumin Creatinine Ratio          | $\geq 1$ drug exposures to ACE Inhibitor/ARB drug <sup>1</sup> $\wedge$ Albumin Creatinine Ratio $> 300\text{mg/dL}^1$<br>$\vee$<br>Exactly 0 drug exposures to ACE Inhibitor/ARB drug <sup>1</sup> $\wedge$ Albumin Creatinine Ratio $> 200\text{mg/dL}^1$ |
|                                      | No Angina Pectoris                                                                                      | Exactly 0 diagnoses of Angina Pectoris <sup>2</sup>                                                                                                                                                                                                         |
|                                      | No Heart Failure                                                                                        | Exactly 0 diagnoses of Myocardial Infarction <sup>3</sup>                                                                                                                                                                                                   |
|                                      | No Acute Coronary Syndrome                                                                              | Exactly 0 diagnoses of ACS <sup>3</sup>                                                                                                                                                                                                                     |
|                                      | No Coronary Revascularization                                                                           | Exactly 0 procedures of coronary revascularization <sup>2</sup>                                                                                                                                                                                             |
| No Stroke                            | Exactly 0 diagnoses of stroke <sup>2</sup>                                                              |                                                                                                                                                                                                                                                             |
| No Ischemic Cerebrovascular Episodes | Exactly 0 diagnoses of ischemic cerebrovascular episodes <sup>2</sup>                                   |                                                                                                                                                                                                                                                             |

<sup>1</sup>between all days before and 1 days before index start date

<sup>2</sup>between 90 days before and 1 days before index start date

<sup>3</sup>between 30 days before and 1 days before index start date



**SUPPLEMENTARY TABLE 9: RENAAL, Concept Definitions**

|            |         | Included Concepts        |              | Excluded Concepts        |              |
|------------|---------|--------------------------|--------------|--------------------------|--------------|
| Indication | concept | concept code             | concept name | concept code             | concept name |
|            |         | Type 2 Diabetes Mellitus | 201826       | Type 2 diabetes mellitus |              |

|                       |                                                       | Included Concepts                       |                                                                   | Excluded Concepts |                                                |
|-----------------------|-------------------------------------------------------|-----------------------------------------|-------------------------------------------------------------------|-------------------|------------------------------------------------|
| Eligibility Criteria  | concept                                               | concept code                            | concept name                                                      | concept code      | concept name                                   |
|                       | Nephropathy                                           | 37019299                                | Nephropathy                                                       |                   |                                                |
|                       | Hypertension                                          | 316866                                  | Hypertensive disorder                                             |                   |                                                |
|                       | Systolic Blood Pressure                               | 3018586                                 | Systolic blood pressure--sitting                                  |                   |                                                |
|                       | Insulin                                               | 21600713                                | Insulins and Analogues                                            |                   |                                                |
|                       | Ketoacidosis                                          | 4209145                                 | Ketoacidosis                                                      |                   |                                                |
|                       | HbA1c                                                 | 40775446                                | Hemoglobin A1c l Bld-Ser-Plas                                     |                   |                                                |
|                       | Pregnancy                                             | 44786908                                | HEDIS 2014 Value Set - Pregnancy Tests                            |                   |                                                |
|                       | Type I Diabetes Mellitus                              | 201254                                  | Type 1 diabetes mellitus                                          |                   |                                                |
|                       | Non Diabetic Renal Disease                            | 37019308                                | Renal disorder                                                    | 443731            | Renal disorder due to type 2 diabetes mellitus |
|                       |                                                       |                                         |                                                                   | 193782            | End stage renal disease                        |
|                       |                                                       |                                         |                                                                   | 46271022          | Chronic kidney disease                         |
|                       | Myocardial Infarction                                 | 4329847<br>35205189                     | Myocardial infarction                                             |                   |                                                |
|                       |                                                       |                                         |                                                                   |                   |                                                |
|                       | Coronary Artery Bypass Grafting                       | 37522318                                | Coronary artery bypass                                            |                   |                                                |
|                       | Cerebrovascular Accident                              | 36703451                                | Central nervous system haemorrhages and cerebrovascular accidents |                   |                                                |
|                       | Percutaneous transluminal coronary angioplasty (PTCA) | 2000064<br>4006788                      | Percutaneous transluminal coronary angioplasty                    |                   |                                                |
|                       |                                                       |                                         |                                                                   |                   |                                                |
|                       | Transient Ischemic Attack (TIA)                       | 373503                                  | Transient cerebral ischemia                                       |                   |                                                |
|                       | Heart Failure                                         | 316139                                  | Heart failure                                                     |                   |                                                |
| Renal Artery Stenosis | 37003676                                              | Renal vascular and ischaemic conditions |                                                                   |                   |                                                |
| Primary Aldosteronism | 35506454                                              | Primary hyperaldosteronism              |                                                                   |                   |                                                |
| Phaeochromocytoma     | 4118993                                               | Pheochromocytoma                        |                                                                   |                   |                                                |

Note that all concept definitions include descendants

**SUPPLEMENTARY TABLE 10: RENAAL, Cohort Creation**

|            |                                                                                                                                                                      |
|------------|----------------------------------------------------------------------------------------------------------------------------------------------------------------------|
| Indication | A condition occurrence of Type 2 Diabetes Mellitus<br>^<br>70 years ≥ Age ≥ 31 years<br>^<br>Continuous observation of at least 0 days before and 0 days after index |
|------------|----------------------------------------------------------------------------------------------------------------------------------------------------------------------|

|                          |                                                           |                                                                                                                    |
|--------------------------|-----------------------------------------------------------|--------------------------------------------------------------------------------------------------------------------|
| Eligibility<br>Criteria  | Nephropathy                                               | A diagnoses of nephropathy exposures to antihypertensive <sup>1</sup>                                              |
|                          | Hypertensive or Normotensive                              | A diagnoses of hypertension <sup>1</sup><br>v<br>≥1 measurement of Systolic Blood Pressure ≥ 110 mmHg <sup>1</sup> |
|                          | No Recent Insulin Use                                     | Exactly 0 drug exposures of Insulin <sup>2</sup>                                                                   |
|                          | No history Ketoacidosis                                   | Exactly 0 diagnoses of Ketoacidosis <sup>1</sup>                                                                   |
|                          | HbA1c < 12%                                               | ≥1 measurement of HbA1c <12% <sup>1</sup>                                                                          |
|                          | Not Pregnant                                              | Exactly 0 measurements of a Pregnancy Test with value > 25 <sup>3</sup>                                            |
|                          | No Type I Diabetes Mellitus                               | Exactly 0 diagnoses of Type I Diabetes Mellitus <sup>1</sup>                                                       |
|                          | No Diabetic Renal Disease                                 | Exactly 0 diagnoses of Non-Diabetic Renal Disease <sup>1</sup>                                                     |
|                          | No Myocardial Infarction                                  | Exactly 0 diagnoses of Myocardial Infarction <sup>4</sup>                                                          |
|                          | No CABG                                                   | Exactly 0 procedures of CABG <sup>4</sup>                                                                          |
|                          | No Cerebrovascular Accident                               | Exactly 0 diagnoses of Cerebrovascular Accident <sup>2</sup>                                                       |
|                          | No PTCA                                                   | Exactly 0 procedures of PTCA <sup>4</sup>                                                                          |
|                          | No TIA                                                    | Exactly 0 diagnoses of TIA <sup>5</sup>                                                                            |
|                          | No Heart Failure                                          | Exactly 0 diagnoses of Heart Failure <sup>1</sup>                                                                  |
|                          | No Renal Artery Stenosis                                  | Exactly 0 diagnoses of Renal Artery Stenosis <sup>1</sup>                                                          |
| No Primary Aldosteronism | Exactly 0 diagnoses of Primary Aldosteronism <sup>1</sup> |                                                                                                                    |
| No Pheochromocytoma      | Exactly 0 diagnoses of Pheochromocytoma <sup>1</sup>      |                                                                                                                    |

<sup>1</sup>between all days before and 1 days before index start date

<sup>2</sup>between 180 days before and 1 days before index start date

<sup>3</sup>between 300 days before and 0 days before index start date

<sup>4</sup>between 30 days before and 0 days before index start date

<sup>5</sup>between 365 days before and 0 days before index start date
